# Supplementary material for: Multi-Functional Potential of Lactic Acid Bacteria Strains and Antimicrobial Effects in Minimally Processed Pomegranate (Punica granatum L. cv Jolly Red) Arils
Source: MDPI journal article supplement (doi:10.3390/microorganisms10101876), 2022-09-20
Supplement: s1 [file s1]

**Table S1.** Antibacterial activity of LAB both as cells or CFSs (expressed as mm) against target bacteria by agar-well diffusion method

| Strains                   |       | <i>Listeria monocytogenes</i><br>ATCC 19114 | <i>Escherichia coli</i> ATCC<br>25922 | <i>Salmonella</i><br>Typhimurium ATCC<br>14026 | <i>Pseudomonas aeruginosa</i><br>ATCC 14026 | <i>Staphylococcus aureus</i> ATCC<br>29213 |
|---------------------------|-------|---------------------------------------------|---------------------------------------|------------------------------------------------|---------------------------------------------|--------------------------------------------|
| <i>L. fermentum</i> LBF4  | Cells | 16.00±1.00                                  | 15.50±0.50                            | 13.50±0.70                                     | 11.00±0.00                                  | 14.00±1.41                                 |
|                           | CFS   | 20.00 0.00                                  | 20.00±1.00                            | 15.50±0.70                                     | 12.00±1.41                                  | 16.00±1.41                                 |
| <i>L. fermentum</i> LBF5  | Cells | 16.00±0.00                                  | 14.50±0.50                            | 13.00±0.00                                     | 13.50±1.50                                  | 12.50±0.50                                 |
|                           | CFS   | 19.33±0.57                                  | 18.00 ±1.00                           | 14.66±0.57                                     | 14.50±0.70                                  | 15.33±0.47                                 |
| <i>L. fermentum</i> LBF15 | Cells | 14.00±1.00                                  | 14.00±1.00                            | 14.50±1.50                                     | 10.50±0.70                                  | 10.00±1.41                                 |
|                           | CFS   | 18.00±0.00                                  | 17.00±1.00                            | 13.00±0.00                                     | 11.00±1.00                                  | 15.50±0.50                                 |
| <i>L. rhamnosus</i> LBF16 | Cells | 15.50±0.70                                  | 13.50±0.50                            | 11.00±1.00                                     | 10.00±0.00                                  | 13.00±1.00                                 |
|                           | CFS   | 18.00±0.00                                  | 17.00±1.00                            | 14.16±1.04                                     | 14.00±0.00                                  | 16.00±0.00                                 |
| <i>L. fermentum</i> LBF17 | Cells | 13.00±0.50                                  | 12.00±1.00                            | 11.00±1.00                                     | 09.00±1.00                                  | 09.50±0.50                                 |
|                           | CFS   | 12.66±057                                   | 12.00 ±1.00                           | 11.66±0.57                                     | 10.00±0.00                                  | 10.66±0.57                                 |
| <i>L. paracasei</i> LBF19 | Cells | 14.50±1.50                                  | 14.00±0.00                            | 9.50±0.50                                      | 10.50±0.70                                  | 12.50±0.70                                 |
|                           | CFS   | 17.50±0.50                                  | 17.00 ±1.00                           | 10.5±0.70                                      | 11.50±0.70                                  | 14.25±1.06                                 |
| <i>E. faecium</i> LBF20   | Cells | 15.50±1.50                                  | 15.50±0.50                            | 11.00±1.00                                     | 10.00±0.50                                  | 14.50±0.70                                 |
|                           | CFS   | 17.00±0.00                                  | 17.33 ±0.57                           | 13.00±0.00                                     | 10.00±0.70                                  | 16.00±0.00                                 |

Data are expressed as mean ± standard deviation of three replicates.
